# Supplementary material for: A supramolecular adduct of tegafur and syringic acid: the first tegafur-nutraceutical cocrystal with perfected in vitro and in vivo characteristics as well as synergized anticancer activities
Source: Royal Society of Chemistry journal article supplement (doi:10.1039/d0nj03033c), 2020-01-01
Supplement: d0nj03033c1.pdf [file d0nj03033c1.pdf]

## Supplementary Information

### **A supramolecular adduct of tegafur and syringic acid: The first tegafur-nutraceutical cocrystal with the perfected *in vitro* and *in vivo* characteristics as well as synergized anticancer activities**

Yue-Ming Yu,<sup>a,+</sup> Ming-Chao Yu,<sup>a,+</sup> Ling-Yang Wang,<sup>a</sup> Yan-Tuan Li,<sup>a,b,\*</sup> Zhi-Yong Wu,<sup>a,\*</sup> and Cui-Wei Yan<sup>a,\*</sup>

<sup>a</sup>*School of Medicine and Pharmacy and College of Marine Life Science, Ocean University of China, Qingdao, Shandong 266003, PR China.*

<sup>b</sup>*Laboratory for Marine Drugs and Bioproducts, Qingdao National Laboratory for Marine Science and Technology, 266003, PR China.*

\* Correspondence to: Yan-Tuan Li, Zhi-Yong Wu and Cui-Wei Yan.

E-mail addresses: [yantuanli@ouc.edu.cn](mailto:yantuanli@ouc.edu.cn) (Yan-Tuan Li), [wzy\\_ouc@163.com](mailto:wzy_ouc@163.com) (Zhi-Yong Wu) [cuiweiyang@ouc.edu.cn](mailto:cuiweiyang@ouc.edu.cn) (Cui-Wei Yan).

---

<sup>+</sup>These authors contributed equally to this work.

\*Correspondence to: Yan-Tuan Li, Zhi-Yong Wu and Cui-Wei Yan.

E-mail address: [yantuanli@ouc.edu.cn](mailto:yantuanli@ouc.edu.cn); Zhi-Yong Wu, E-mail: [wzy\\_ouc@163.com](mailto:wzy_ouc@163.com) Cui-Wei Yan, E-mail: [cuiweiyang@ouc.edu.cn](mailto:cuiweiyang@ouc.edu.cn).

## **Contents**

**Fig. S1.** FT-IR spectra of TF-SYA compared with its starting materials.

**Fig. S2.** PXRD patterns of TF-SYA at buffers pH and simulated.

**Fig. S3.** IDR profiles of TF, SYA and TF-SYA.

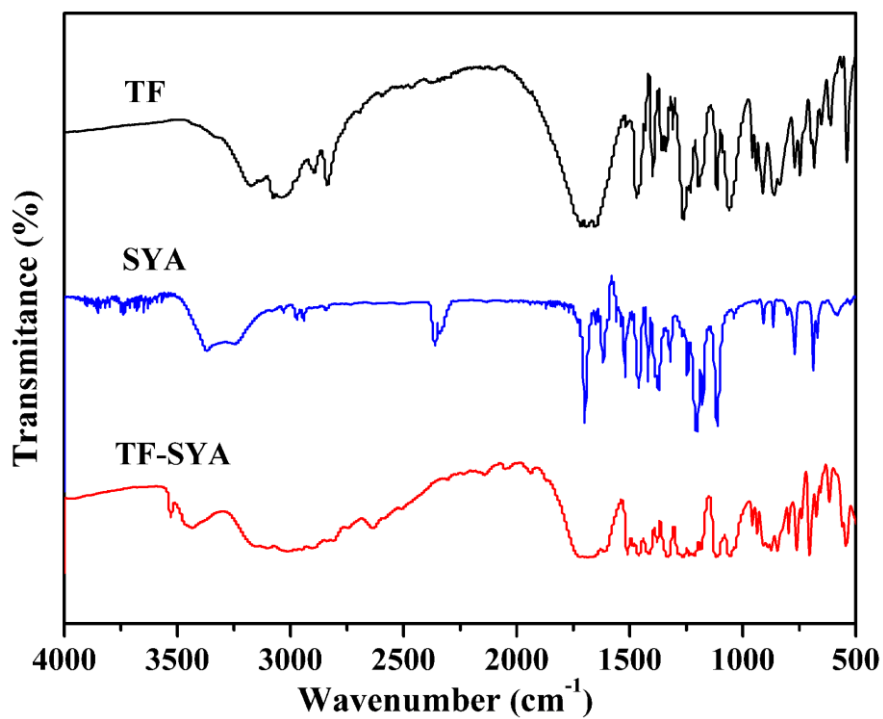

Fig. S1. IR spectra of TF, SYA and TF-SYA.

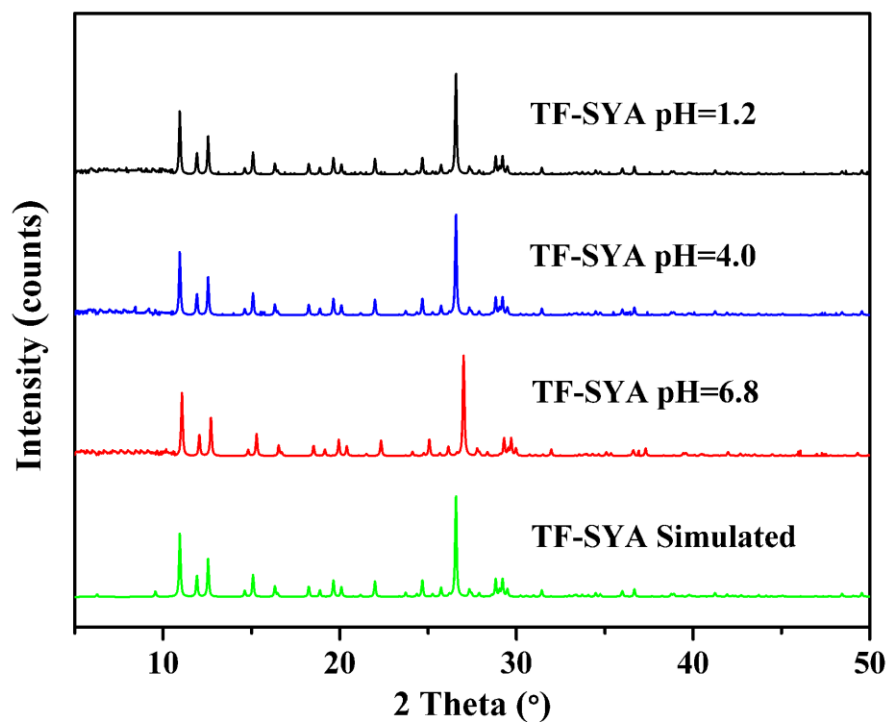

Fig. S2. PXRD patterns of TF-SYA at buffers pH and simulated.

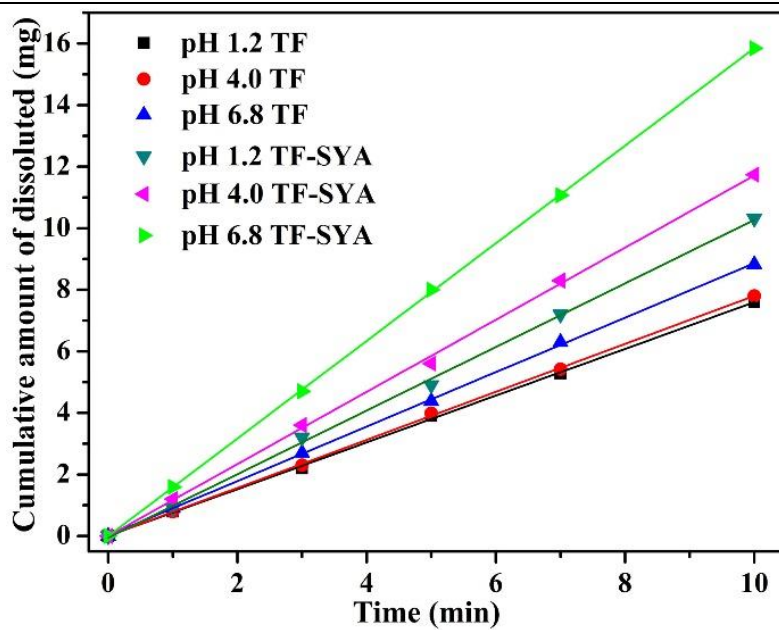

Fig. S3. IDR profiles of TF, SYA and TF-SYA at pH 1.2, 4.0, and 6.8.
